# Supplementary material for: Developing a Japanese Version of the Baron Depression Screener for Athletes among Male Professional Rugby Players
Source: MDPI journal article supplement (doi:10.3390/ijerph17155533), 2020-07-31
Supplement: s1 [file s1]

**Table S1.** Proportion of participants' responses to the Japanese version of the Baron Depression Screener for Athletes (BDSA-J) (n = 235).

| Item no. | Statement                                                                                    | Never % (n) | Some of the time (over a 2-week period) % (n) | Most of the time (over a 2-week period) % (n) | Mean (SD)   |
|----------|----------------------------------------------------------------------------------------------|-------------|-----------------------------------------------|-----------------------------------------------|-------------|
| 1        | I feel sad even after a good practice session or successful competition.                     | 76.6 (180)  | 21.7 (51)                                     | 1.7 (4)                                       | 0.25 (0.47) |
| 2        | I rarely get pleasure from competing anymore and have lost interest in my sport.             | 64.7 (152)  | 33.6 (79)                                     | 1.7 (4)                                       | 0.37 (0.52) |
| 3        | I get little or no pleasure from my athletic successes.                                      | 52.3 (123)  | 30.6 (72)                                     | 17.0 (40)                                     | 0.65 (0.76) |
| 4        | I am having problems with my appetite and weight.                                            | 60.0 (141)  | 27.7 (65)                                     | 12.3 (29)                                     | 0.52 (0.71) |
| 5        | I do not feel rested and refreshed when I wake up.                                           | 17.9 (42)   | 70.2 (165)                                    | 11.9 (28)                                     | 0.94 (0.54) |
| 6        | I am having problems maintaining my focus and concentration during training and competition. | 40.9 (96)   | 53.6 (126)                                    | 5.5 (13)                                      | 0.65 (0.58) |
| 7        | I feel like a failure as an athlete and person.                                              | 56.6 (133)  | 38.7 (91)                                     | 4.7 (11)                                      | 0.48 (0.59) |
| 8        | I cannot stop thinking about being a failure and quitting sports.                            | 45.5 (107)  | 46.4 (109)                                    | 8.1 (19)                                      | 0.63 (0.63) |
| 9        | I am drinking alcohol or taking supplements to improve my mood.                              | 60.0 (141)  | 35.7 (84)                                     | 4.3 (10)                                      | 0.44 (0.58) |
| 10       | I have thoughts of ending my life.                                                           | 91.9 (216)  | 8.1 (19)                                      | 0 (0)                                         | 0.08 (0.27) |

Calculation of mean score: Never = 0, Some of the time = 1, Most of the time = 2
